# Supplementary material for: Evaluation of an assay for methylated BCAT1 and IKZF1 in plasma for detection of colorectal neoplasia
Source: Springer Nature journal article supplement (doi:10.1186/s12885-015-1674-2), 2015-10-06
Supplement: MOESM2 [file 9745126]

**Table S3 Recruitment details for the participating hospitals.**

|                                             | Recruitment Centres    |                        |                        |                          | <b>Total</b>                  |
|---------------------------------------------|------------------------|------------------------|------------------------|--------------------------|-------------------------------|
|                                             | <b>FMC<sup>1</sup></b> | <b>RGH<sup>2</sup></b> | <b>AMC<sup>3</sup></b> | <b>Flevo<sup>4</sup></b> |                               |
| <b>Recruits</b> (No. (Age <sup>5</sup> ))   | 1422 (62)              | 347 (64)               | 162 (63)               | 170 (63)                 | 2101                          |
| <b>Females</b> (No. (%), Age <sup>5</sup> ) | 656 (46), 61           | 170 (49), 65           | 73 (45), 62            | 72 (42), 64              | 971                           |
| <b>Males</b> (No. (%), Age <sup>5</sup> )   | 766 (54), 62           | 177 (51), 63           | 89 (55), 64            | 98 (58), 62              | 1130                          |
| <b>Primary Diagnosis</b>                    |                        |                        |                        |                          | <b>Chi square<sup>6</sup></b> |
| <b>Cancer</b> (No., (%))                    | 58 (4)                 | 12 (3.5)               | 22 (14)                | 37 (22)                  | 1.4142, n.s                   |
| # Positive blood results (%), 95%CI         | 35 (60), 47-73         | 7 (58), 28-85          | 12 (55), 32-76         | 31 (84), 68-94           |                               |
| <b>Adenoma</b> (No., (%))                   | 421 (30)               | 106 (31)               | 76 (47)                | 81 (48)                  | 1.754, n.s                    |
| # Positive blood results (%), 95%CI         | 29 (7), 5-10           | 8 (8), 3-14            | 2 (3), 0.3-9           | 4 (5), 1-12              |                               |
| <b>Non-neoplastic</b> (No., (%))            | 631 (44)               | 181 (52)               | 15 (9)                 | 11 (6)                   | 2.597, n.s                    |
| # Positive blood results (%), 95%CI         | 36 (6), 4-8            | 13 (7), 4-12           | 0 (n/a), 0-22          | 3 (27), 6-61             |                               |
| <b>No evidence of disease</b> (No., (%))    | 312 (22)               | 48 (14)                | 49 (27)                | 41 (24)                  | 7.008, n.s                    |
| # Positive blood results (%), 95%CI         | 9 (3), 1-5             | 2 (4), 0.5-14          | 9 (18), 9-32           | 4 (10), 3-23             |                               |

<sup>1</sup>Flinders Medical Centre <sup>2</sup>Repatiation General Hospital, <sup>3</sup>Academic Medical Centre, <sup>4</sup>Flevo Hospital, <sup>5</sup>Median age in years. <sup>6</sup>Based on

4x2 contingency tables using the overall positive rate measured in the study population to calculate the expected positive rates across each collection site. A Chi Square statistic was performed on observed versus expected positivity rates using a 0.05 significance value. n.s = not statistically significant.
