# Supplementary material for: Evaluation of an assay for methylated BCAT1 and IKZF1 in plasma for detection of colorectal neoplasia
Source: Springer Nature journal article supplement (doi:10.1186/s12885-015-1674-2), 2015-10-06
Supplement: MOESM3 [file 9745126]

**Table S4. Gender versus assay positivity**

|                   | <u>Total</u> | <u>Female</u> | <u>Male</u> | <u>Z-score</u> <sup>1</sup> |
|-------------------|--------------|---------------|-------------|-----------------------------|
|                   |              | No. +ve/Tot   | No. +ve/Tot |                             |
| <u>Non-cancer</u> | 1972         | 49/918        | 70/1054     | -1.213, p = 0.226           |
| <u>Cancer</u>     | 129          | 36/54         | 49/75       | 0.1576, p = 0.873           |

<sup>1</sup><http://www.socscistatistics.com/tests/ztest/Default2.aspx>

**Table S5. Family CRC history and assay positivity**

| <b>2039 records of family history</b> | <b>Blood test positivity</b> | <u>Z-score</u> <sup>1</sup> |
|---------------------------------------|------------------------------|-----------------------------|
| No.                                   | No. (%); 95%CI               |                             |
| <u>Cancer cases</u>                   | <u>87</u>                    | <u>51 (59); 48-69</u>       |
| No family CRC history                 | 82                           | 48 (59); 47-69              |
| Family CRC history                    | 5                            | 3 (60); 15-95               |
|                                       |                              | -0.065, p = 0.952           |
| <u>Non-Cancer cases</u>               | <u>1952</u>                  | <u>118 (6); 5-7</u>         |
| No family CRC history                 | 1629                         | 103 (6); 5-8                |
| Family CRC history                    | 323                          | 15 (5); 3-8                 |
|                                       |                              | 1.1566, p = 0.246           |

<sup>1</sup><http://www.socscistatistics.com/tests/ztest/Default2.aspx>

**Table S6. Assay positivity relative to tumour location – corrected for stage**

| <u>Location</u> | Stage I | Stage II | Stage III | Stage IV | Unstaged |
|-----------------|---------|----------|-----------|----------|----------|
| Distal          | 16      | 16       | 21        | 10       | 1        |
| Proximal        | 13      | 21       | 14        | 3        | 0        |
| n/a             | 0       | 5        | 5         | 3        | 1        |
